# Supplementary material for: Post-thymic regulation of CD5 levels in human memory T cells is inversely associated with the strength of responsiveness to interleukin-15
Source: PubMed Central journal article supplement — Hum Immunol. 2011 Aug;72(8):627–31. doi: 10.1016/j.humimm.2011.03.028 (PMC3144390; doi:10.1016/j.humimm.2011.03.028), 2011-08
Supplement: mmc1.pdf [file mmc1.pdf]

A

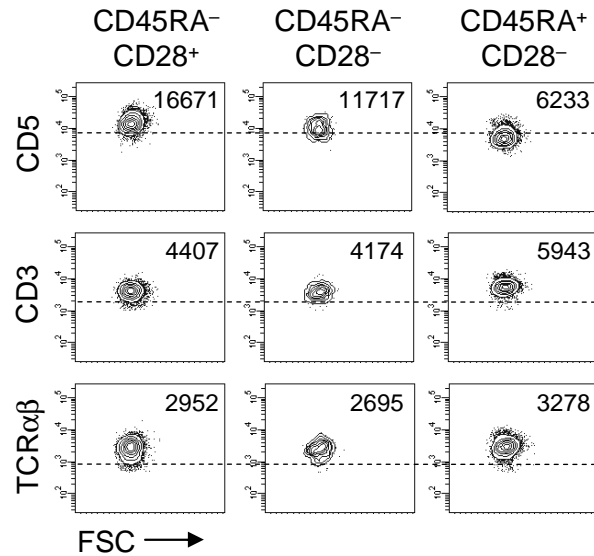

B

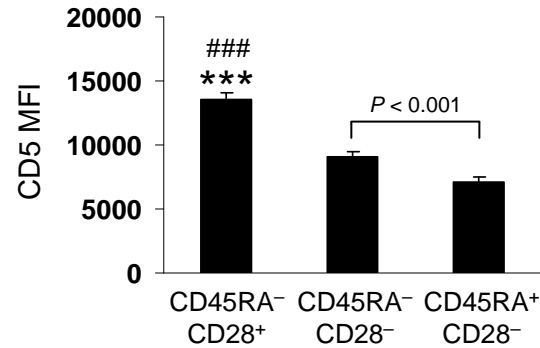

C

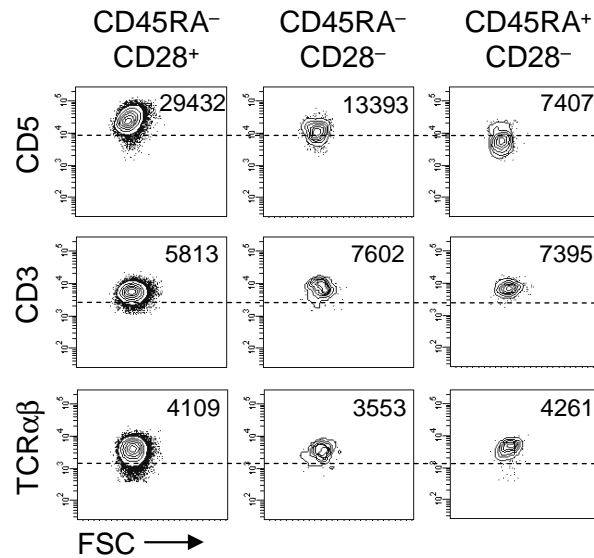

D

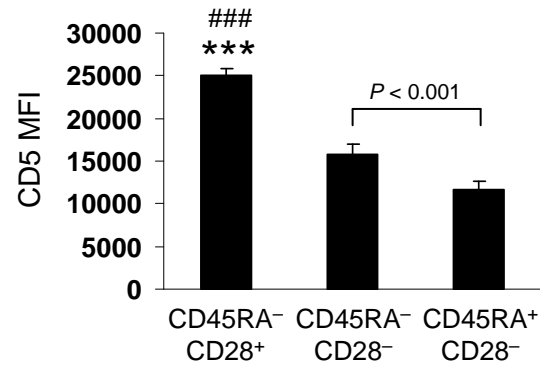

**Supplementary Figure 1. CD5 is down-regulated during peripheral human CD8<sup>+</sup> and CD4<sup>+</sup> memory T cell differentiation.** (A) The density plots show the expression of CD5, CD3 and TCRαβ on human CD8<sup>+</sup> memory T cell subsets. Memory subsets were classified by the expression of CD45RA and CD28. The numbers indicate the MFI of the respective surface molecule. Data are representative of seven experiments. (B) The bar graph shows CD5 MFI on human CD8<sup>+</sup> memory T cell subsets (n=71). Statistical analysis was performed using paired Student's *t* test. \*\*\*  $P < 0.001$ , CD45RA<sup>-</sup>CD28<sup>+</sup> vs. CD45RA<sup>-</sup>CD28<sup>-</sup> and ###  $P < 0.001$  CD45RA<sup>-</sup>CD28<sup>+</sup> vs. CD45RA<sup>+</sup>CD28<sup>-</sup>. (C) The density plots show the expression of CD5, CD3 and TCRαβ on human CD4<sup>+</sup> memory T cell subsets. The numbers indicate the MFI of the respective surface molecule. Data are representative of seven experiments. (D) The bar graph shows CD5 MFI on human CD4<sup>+</sup> memory T cell subsets (n=52). Statistical analysis was performed using paired Student's *t* test. \*\*\*  $P < 0.001$ , CD45RA<sup>-</sup>CD28<sup>+</sup> vs. CD45RA<sup>-</sup>CD28<sup>-</sup> and ###  $P < 0.001$  CD45RA<sup>-</sup>CD28<sup>+</sup> vs. CD45RA<sup>+</sup>CD28<sup>-</sup>.
